# Supplementary material for: Detection of monkeypox virus based on a convenient and sensitive single-step RPA-CRISPR/Cas12a strategy
Source: Royal Society of Chemistry journal article supplement (doi:10.1039/d4ra02049a), 2024-01-01
Supplement: d4ra02049a1.pdf [file d4ra02049a1.pdf]

## Supplementary Materials

Tao Yu<sup>a,b,†</sup>, Zhen Rong<sup>b,†</sup>, Zhixia Gu<sup>c,†</sup>, Hongjuan Wei<sup>b</sup>, Yunxiang Wang<sup>b</sup>, Rui Song<sup>c,\*</sup>, Shengqi Wang<sup>b,\*</sup> & Shumei Wang<sup>d,\*</sup>

<sup>a</sup> School of Pharmacy, Guangdong Pharmaceutical University, Guangzhou, Guangdong 510006, China.

<sup>b</sup> Bioinformatics Center of AMMS, Beijing 100850, China.

<sup>c</sup> Beijing Ditan Hospital, Capital Medical University, Beijing 100102, China.

<sup>d</sup> School of Chinese Materia Medica, Guangdong Pharmaceutical University, Guangzhou, Guangdong 510006, China.

†T. Yu, Z Rong and Z.-X. Gu contributed equally to this work.

### Corresponding Author

\*Shumei Wang, E-mail: [gdpuwsm@126.com](mailto:gdpuwsm@126.com).

\*Shengqi Wang, E-mail: [sqwang@bmi.ac.cn](mailto:sqwang@bmi.ac.cn).

\*Rui Song, E-mail: [songruii@hotmail.com](mailto:songruii@hotmail.com).

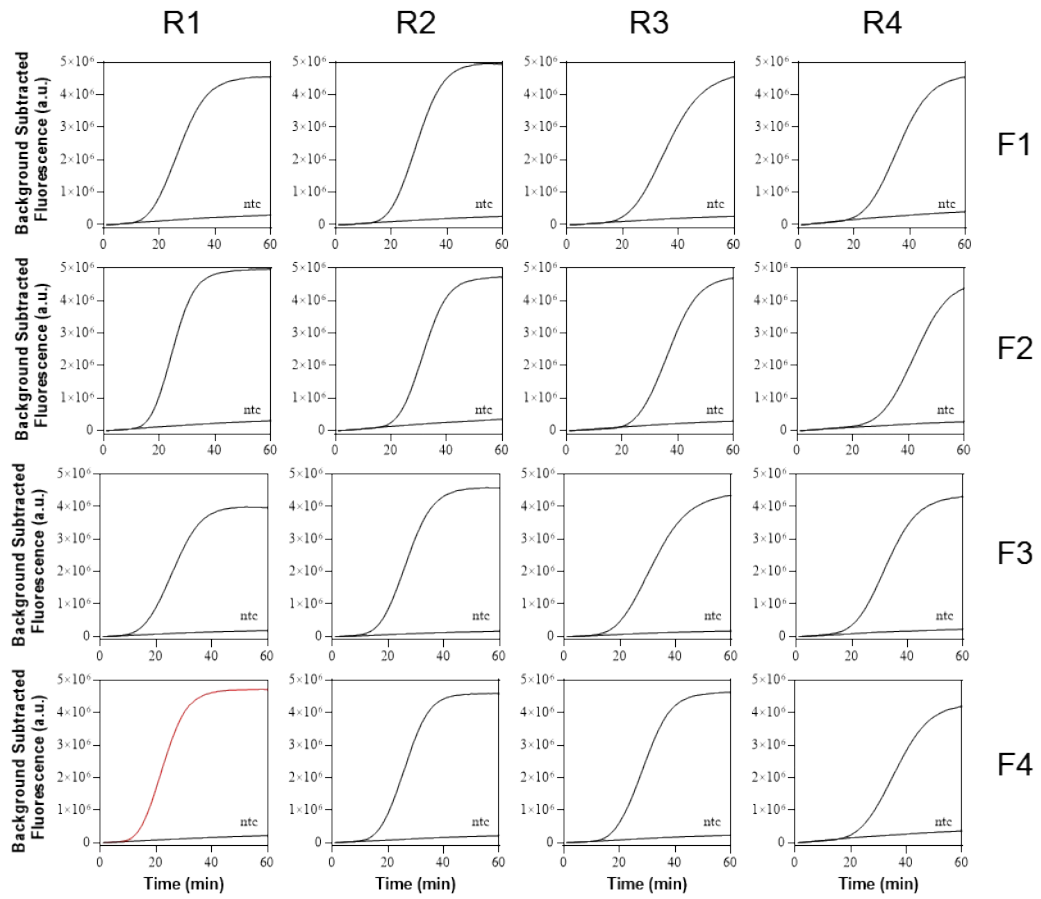

**Fig. S1.** Real-time fluorescence curves were generated using various primer combinations. Fluorescence was measured every min at 37 °C, and the number of target was 1000 copies.

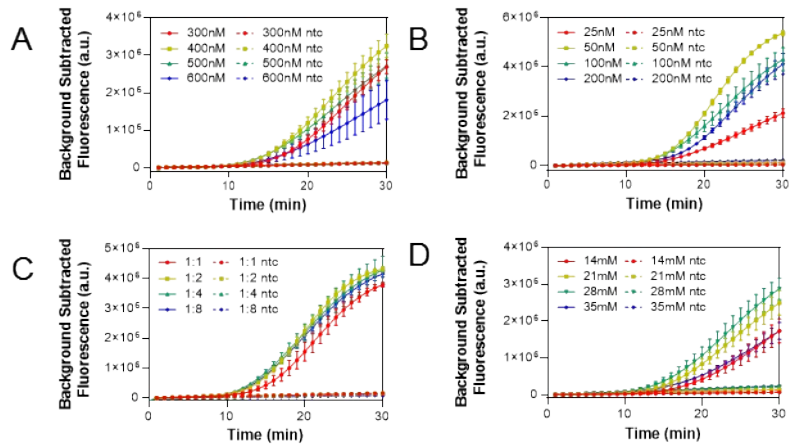

**Fig. S2.** Optimization of the RPA-CRISPR One-Pot Reaction. The fluorescence profiles were recorded in real time at different concentration of primer (A), LbCas12a (B), ratio of LbCas12a to crRNA (C), and MgOAc (D).

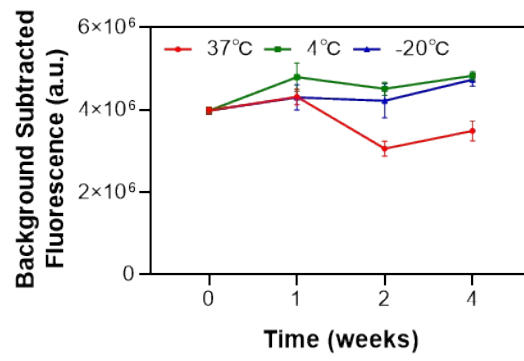

**Fig. S3.** The end-point fluorescence intensity at 30 min of one-step RPA-CRISPR/Cas12a using the lyophilized reagents stored at 37 °C, 4 °C, and -20 °C for 0, 1, 2, and 4 weeks. Target: 100 copies/reaction.

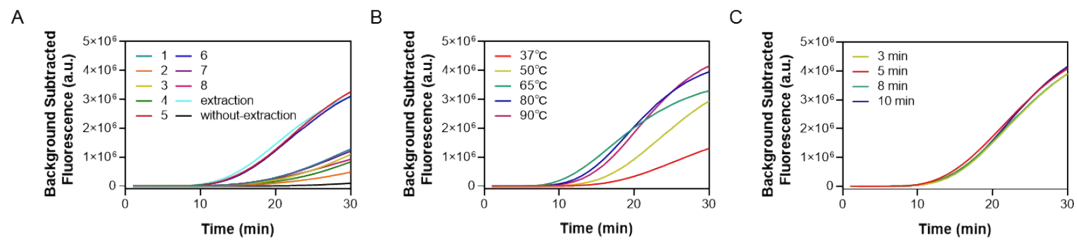

**Fig. S4.** Optimization of viral lysis. (A) The single-step RPA-CRISPR/Cas12 reaction was tested with 20 copies/ $\mu\text{L}$  simulated samples which was lysed by eight kinds of lysis buffers, extraction assay and no treatments at 95 °C for 10 min. (B) Fluorescence profiles with lysis buffer 5 at different lysis temperatures. (C) Fluorescence curves for different lysis times at 80 °C.

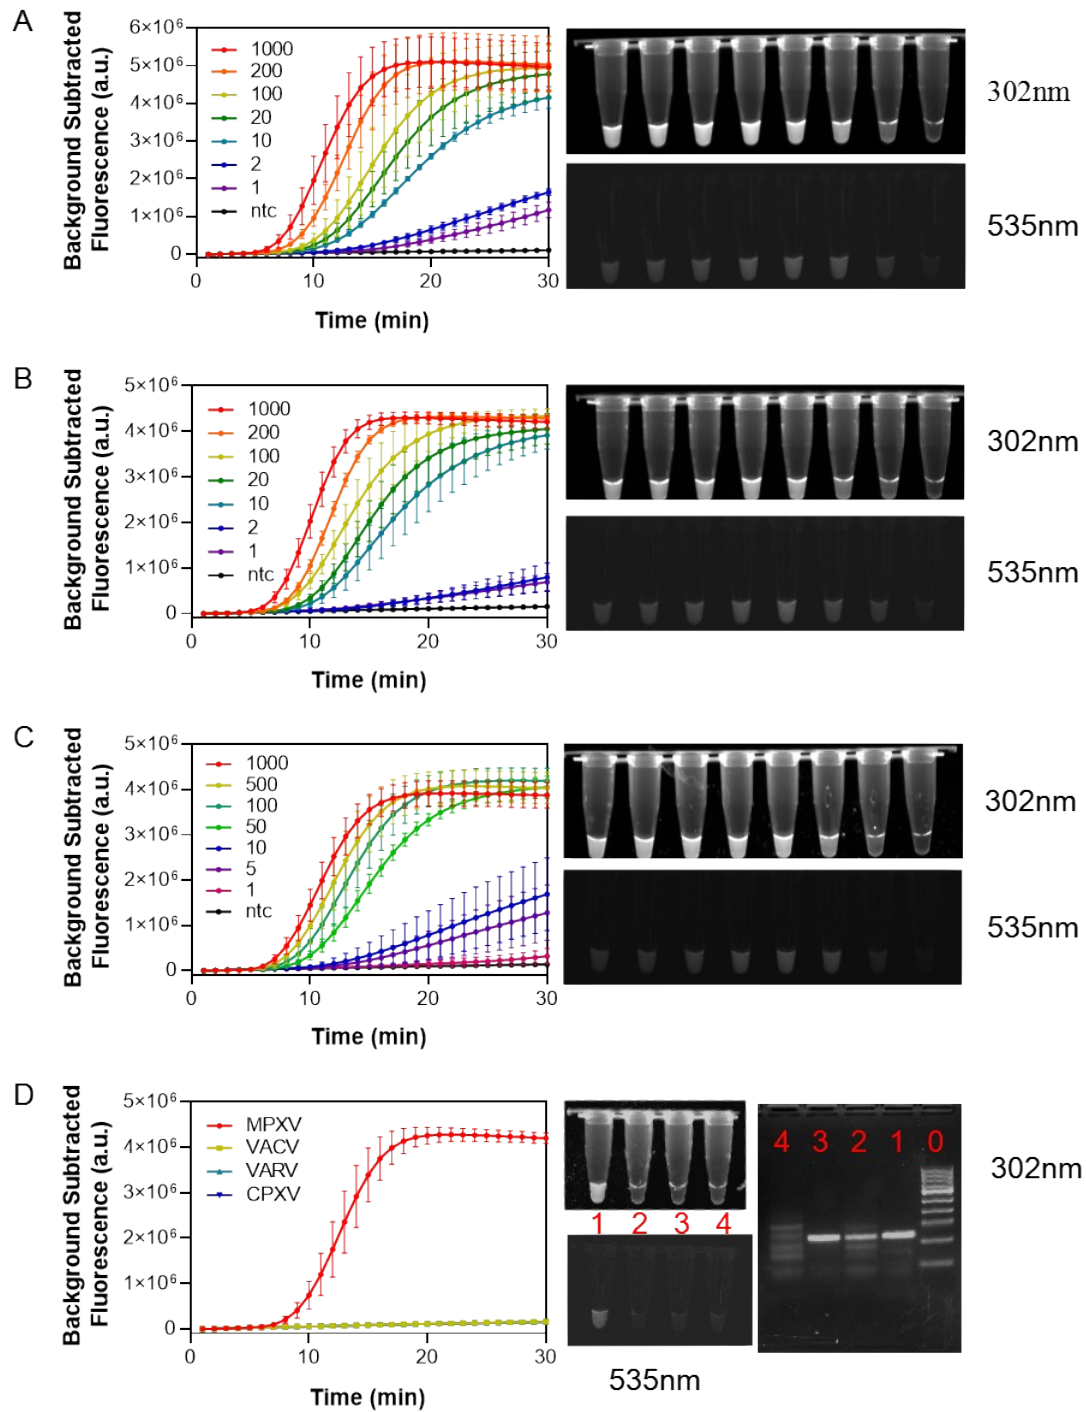

**Fig. S5.** A–D. Figure on the left shows the real-time fluorescence curve. Figure on the right is an image taken with a gel imager. 302 nm: a light source with a wavelength of 302 nm was used; 535 nm: a blue light source was used, and the wavelength of the filter was 535 nm. (A) Detection of different concentrations of extracted DNA with freshly configured reagents. (B) Detection of different concentrations of extracted DNA using lyophilized reagents. (C) Detection of different concentrations of pseudoviruses in saliva, with lyophilized reagent and lysate. (D) Fluorescence images taken at the endpoint of detection of four orthopoxviruses and electropherograms using a 3% agarose gel. 0: 50–500 bp marker; 1: MPXV F3L gene; 2: VACV E3L gene; 3: VARV E3L gene; 4: CPXV F3L gene.

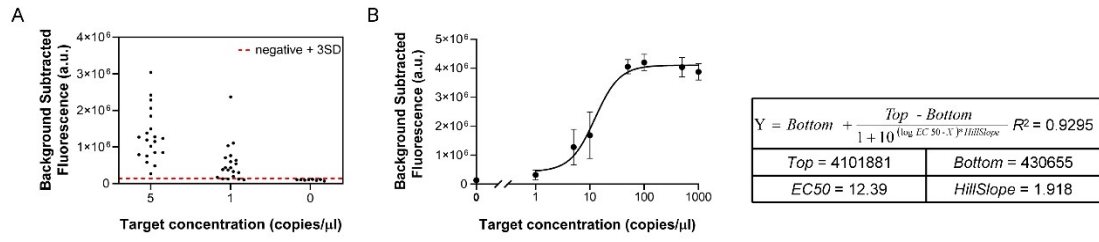

**Fig. S6.** (A) A scatter plot showing endpoint fluorescence values with background fluorescence removed for 20 replicates of low copy number pseudovirus samples in saliva. (B) A four-parameter fit curve was generated for the fluorescence values in relation to the sample concentration of the pseudovirus simulation.

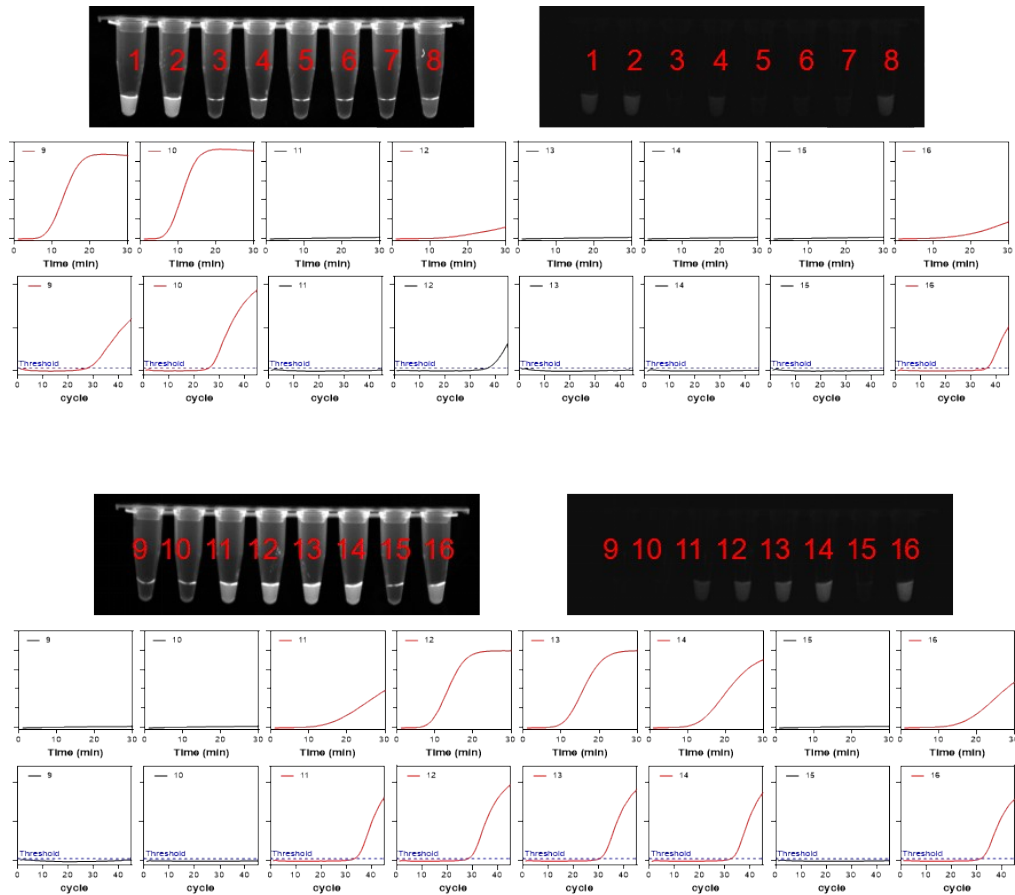

**Fig. S7.** The detection results of 16 clinical samples are shown, in order of top to bottom, as endpoint (30 min) fluorescence pictures and real-time fluorescence curves for the RPA-CRISPR/Cas12a method and real-time fluorescence curves for the real-time PCR method.



**Table S1.** The reagents used in this study.

| <b>Reagent</b>                           | <b>Reaction</b>               | <b>Manufacturer</b>                      | <b>Cat.no.</b> | <b>Stock Concentration</b> |
|------------------------------------------|-------------------------------|------------------------------------------|----------------|----------------------------|
| LbCas12a                                 | Single-step RPA-CRISPR/Cas12a | Tolo Biotech Co.,Ltd                     | 32108-03       | 10 $\mu$ M                 |
| RPA lyophilized pellets                  | Single-step RPA-CRISPR/Cas12a | TwistDx                                  | TABAS03KIT     | /                          |
| Rehydration buffer                       | Single-step RPA-CRISPR/Cas12a | TwistDx                                  | TABAS03KIT     | /                          |
| Magnesium acetate tetrahydrate           | Single-step RPA-CRISPR/Cas12a | Sangon Biotech (Shanghai) Co., Ltd.      | A501341-0500   | /                          |
| DNase/RNase-free water                   | /                             | Solarbio Life Science                    | R1600          | /                          |
| DNA Dilution Buffer (for Real Time PCR)  | Gradient dilution of DNA      | Sangon Biotech (Shanghai) Co., Ltd.      | B639270-0010   | /                          |
| HiScribe T7 High Yield RNA Synthesis Kit | IVT                           | New England Biolabs Inc.                 | E2040          | /                          |
| Standard Taq buffer                      | IVT                           | New England Biolabs Inc.                 | B9014          | 10 $\times$                |
| RNA Clean & Concentrator-5 Kit           | IVT                           | Zymo Research                            | R1016          | /                          |
| DNase I                                  | IVT                           | Zymo Research                            | R1016          | /                          |
| Qubit RNA Broad Range Assay Kits         | IVT                           | Thermo Fisher Scientific                 | Q10211         | /                          |
| Qubit 1 $\times$ dsDNA HS Assay Kits     | Plasmid quantitation          | Thermo Fisher Scientific                 | Q33230         | /                          |
| General Agarose                          | agarose gel electrophoresis   | Accurate Biotechnology (Hunan) Co., Ltd. | AG11901        | /                          |
| GelStain                                 | Agarose gel electrophoresis   | Beijing TransGen Biotech Co., Ltd.       | GS101-01       | 10000 $\times$             |
| TBE Buffer                               | Agarose gel electrophoresis   | BeiJing Applygen Technologies Inc.       | B1111          | 10 $\times$                |
| DNA Marker L (50–500 bp)                 | Agarose gel electrophoresis   | Sangon Biotech (Shanghai) Co., Ltd.      | B600305-0050   | /                          |

|                                         |                  |                                                |            |                                               |
|-----------------------------------------|------------------|------------------------------------------------|------------|-----------------------------------------------|
| Tris (pH8.0)                            | Lysis            | Thermo Fisher Scientific                       | 15568025   | 1 M                                           |
| EDTA                                    | Lysis            | Thermo Fisher Scientific                       | AM9260G    | 0.5 M                                         |
| NaOH                                    | Lysis            | Sinopharm Chemical Reagent Co., Ltd            | 10019718   | /                                             |
| Triton X-100                            | Lysis            | Thermo Fisher Scientific                       | 85111      | /                                             |
| Glycine                                 | Lyophilization   | Amresco                                        | 0167       | /                                             |
| Mannitol                                | Lyophilization   | Solarbio Life Science                          | M8140      | /                                             |
| Trehalose                               | Lyophilization   | Sinopharm Chemical Reagent                     | 63012666   | /                                             |
| TIANamp Virus DNA/RNA kit               | Viral extraction | Tiangen Biotech                                | DP315      | /                                             |
| MPXV-F3L pseudovirus reference standard | Mock samples     | National Institute of Metrology, China         | NIM-RM4060 | $(2.74 \pm 0.46) \times 10^3$ copies/ $\mu$ L |
| MPXV-F3L gene pseudovirus               | DNA target       | Fubio (Su Zhou) Biomedical Technology Co., Ltd | FNDV4731   | /                                             |
| CPXV-F3L gene pseudovirus               | Specificity      | Fubio (Su Zhou) Biomedical Technology Co., Ltd | Customised | /                                             |
| VACV-E3L gene plasmids                  | Specificity      | Sangon Biotech (Shanghai) Co., Ltd.            | Customised | /                                             |
| VARV-E3L gene plasmids                  | Specificity      | Sangon Biotech (Shanghai) Co., Ltd.            | Customised | /                                             |
| AK Taq Master PCR Mix (25 $\times$ )    | qPCR             | Fapon Biotech Inc.                             | MD099M     | 25 $\times$                                   |
| AK Taq Buffer (with Mg <sup>2+</sup> )  | qPCR             | Fapon Biotech Inc.                             | MD099M     | 5 $\times$                                    |

**Table S2.** The sequence list of primers, template for crRNA in vitro transcription.

| Item                | Sequence (5'-3')                                                       |
|---------------------|------------------------------------------------------------------------|
| forward primer F1   | ATTTTGTAGCATCTCGTTTAGATTTTCCATC                                        |
| forward primer F2   | TCTCGTTTAGATTTTCCATCTGCCTTATCG                                         |
| forward primer F3   | CCATCTGCCTTATCGAATACTCTTCCGTCA                                         |
| forward primer F4   | TCAATACGAAAAGACCAATCTCTCCTAGTT                                         |
| reverse primer R1   | AAGTCTTTTGATGATGTTATTCCGGTTAAA                                         |
| reverse primer R2   | ATAAGTCTTTTGATGATGTTATTCCGGTTA                                         |
| reverse primer R3   | TGGTCTACGACAATGGATGCTGATACACGG                                         |
| reverse primer R4   | GTTCCGACGATACTCCTCCTCGTTGGTCTA                                         |
| T7-3G IVT primer    | TAATACGACTCACTATAGGG                                                   |
| qPCR forward primer | TACATCATCTATTATAGCATCAGC                                               |
| qPCR reverse primer | CTCCAACGATACTCCTCCTC                                                   |
| qPCR probe          | FAM-AATCTGTAGGCCGT-MGB                                                 |
| crRNA1              | TTATTGGAAAGGTGTTAAC <i>Catctacacttagtagaaattaccctatagtgagtcgtatta</i>  |
| crRNA2              | TTTATTGGAAAGGTGTTAAC <i>Catctacacttagtagaaattaccctatagtgagtcgtatta</i> |
| crRNA3              | AATGGATGCTGATACACGGC <i>Catctacacttagtagaaattaccctatagtgagtcgtatta</i> |
| crRNA4              | CAATGGATGCTGATACACGG <i>atctacacttagtagaaattaccctatagtgagtcgtatta</i>  |

**Table S3.** The list of the lysis buffers used in this study.

| <b>Name</b>    | <b>Component</b>                                                             |
|----------------|------------------------------------------------------------------------------|
| Lysis buffer 1 | 25 mM NaOH, 1 % Triton X-100 in TE buffer [10 mM Tris, 2 mM EDTA (pH 8.0)]   |
| Lysis buffer 2 | 10 mM NaOH, 1 % Triton X-100 in TE buffer [10 mM Tris, 2 mM EDTA (pH 8.0)]   |
| Lysis buffer 3 | 40 mM NaOH, 1 % Triton X-100 in TE buffer [10 mM Tris, 2 mM EDTA (pH 8.0)]   |
| Lysis buffer 4 | 65 mM NaOH, 1 % Triton X-100 in TE buffer [10 mM Tris, 2 mM EDTA (pH 8.0)]   |
| Lysis buffer 5 | 25 mM NaOH, 0.1 % Triton X-100 in TE buffer [10 mM Tris, 2 mM EDTA (pH 8.0)] |
| Lysis buffer 6 | 25 mM NaOH, 0.5 % Triton X-100 in TE buffer [10 mM Tris, 2 mM EDTA (pH 8.0)] |
| Lysis buffer 7 | 25 mM NaOH, 2 % Triton X-100 in TE buffer [10 mM Tris, 2 mM EDTA (pH 8.0)]   |
| Lysis buffer 8 | 25 mM NaOH, 4 % Triton X-100 in TE buffer [10 mM Tris, 2 mM EDTA (pH 8.0)]   |

**Table S4.** The synthetic sequences of the MPXV F3L, CPXV F3L, VARV E3L, and VACV E3L.

| Name     | Sequence (5'–3')                                                                                                                                                                                                                                                                                                                                                                                                                                                                                                                                                                                                                              |
|----------|-----------------------------------------------------------------------------------------------------------------------------------------------------------------------------------------------------------------------------------------------------------------------------------------------------------------------------------------------------------------------------------------------------------------------------------------------------------------------------------------------------------------------------------------------------------------------------------------------------------------------------------------------|
| MPXV F3L | TCAGAATCTAATGATGACATAACTAAGAAGTTTATCTACAGCCAATT<br>TAGCTGCATTATTTTTAGCATCTCGTTTAGATTTTCCATCTGCCTTATC<br>GAATACTCTCCGTCAATGTCTACACAGGCATAAAATGTAGGAGAGT<br>TACTAGGCCCCACTGATTCAATACGAAAAGACCAATCTCTCCTAGTT<br>ATTTGACAGTACTCATTAATAACGGTGACAGGGTTAACACCTTTCCA<br>ATAAATAATTTTTTTAACCGGAATAACATCATCAAAGACTTATGAT<br>CCTCTCTCATTGATTTTTTCGCGGGATACATCATCTATTATAGCATCAG<br>CATCAGAATCTGTAGGCCGTGTATCAGCATCCATTGTCGTAGACCAA<br>CGAGGAGGAGTATCGTTGGAGCTGTAAACCATAGCACTACGTTGAA<br>GATCATACAGAGCTTTATTAACCTCTCGCTTCTCCAT                                                                                                                             |
| CPXV F3L | TCAGAATCTAATGATGACGTACCCAAGAAGTTTATCTACAGCCAATT<br>TAGCTGCATTATTTTTAGCATCTCGTTTAGATTTTCCATCGGCCTTAT<br>CGAATACTCTCCATCGATGTCTACACAGGCATAAAATGTAGGAGAG<br>TTACTAGGTCCCCTGATTCAATACGAAAAGACCAATCTCTCTTAGT<br>TATTTGGCAGTACTCATTAATAATGGTGACAGGGTTAGCATCTTTCC<br>AATCAATAATTTTTTTGGCAGGAATAACATCATCAAAGACTTATGA<br>TCCTCTCTCATTGATTTTTTCGCGGGATACATCATCTATTATGACGTCA<br>GCCATAACATCAGCATCCGTCTTATCCGCCTCCGTTGTCATAAACCA<br>ACGAGGAGGAATATCGTTCGGAGCTGTACACCATATCACTACGTTGAA<br>GATCGTACAGAGCTTTATTAACCTCTCGCTTCTCCATATTAAGTTGTC<br>TAGTTAGTTGTGCAGCAGTAGCTCCTTCGATTCCAATGGTTTTAATAG<br>CCTCACACACAATCTCTGCGTCAGAACGTTTCGTCGATATAGATTTTA<br>GACAT |
| VARV E3L | TCAGAATCTAATGATGACGTAACCAAGAAGTTTATCTACAGCCAATT<br>TAGCTGCATTATTTTTAGCATCTCGTTTAGATTTTCCATCGGCCTTAT<br>CGAATACTCTCCCGTCGATGTCTACACAGGCATAAAATGTAGGAGAG<br>TTACTAGGCCCCACTGATTCAATACGAAAAGACCAATCTCTCTTAGT<br>TATTTGGCAGTACTCATTAATAATGGTGACAGGGTTAGCATTTTTCCA<br>ATCAATAATTTTTTTAGCCGGAATAACATCATCAAAGACTTATGAT<br>CCTCTCTCATTGATTTTTTCGCGGGATACATCATCTATTATGACGTCA<br>CCATAGTCATAGCATCCGGCTTATCCGCCTCAGTTGTCATAAACCAA<br>CGAGGAGGAATATCGTTCGGAGCTGTACACCATAGCACTACGTTGAA<br>GATCGTACAGAGCTTTATTAACCTCTCGCTTCTCCATATTAAGTTGTC<br>TAGTTAGTTGTACAGCAGTAACTCCTTCAAGTCCAATGTTTTAATAG<br>CCTCACATAACAATCTCTGCGTCAGAACGCTCGTCAATATAGATCTTA<br>GACAT |
| VACV E3L | TCAGAATCTAATGATGACGTAACCAAGAAGTTTATCTACTGCCAATT<br>TAGCTGCATTATTTTTAGCATCTCGTTTAGATTTTCCATCTGCCTTATC<br>GAATACTCTCCGTTCGATGTCTACACAGGCATAAAATGTAGGAGAGT<br>TACTAGGCCCCACTGATTCAATACGAAAAGACCAATCTCTCCTAGTA<br>ATTTGGCAGTACTCATTAATAACGGTGACAGGGTTAGCACCTTTCCA                                                                                                                                                                                                                                                                                                                                                                                 |

|                                                                                                                                                                                                                                                                                                                                                                                |
|--------------------------------------------------------------------------------------------------------------------------------------------------------------------------------------------------------------------------------------------------------------------------------------------------------------------------------------------------------------------------------|
| ATCAATAATTTTTTTAGCCGGAATAACATCATCAAAAGACTTATGAT<br>CCTCTCTCATTGATTTTTTCGCGGGATACATCATCTATTATGACGTCAG<br>CCATAGCATCAGCATCCGGCTTATCCGCCTCCGTTGTCATAAACCAA<br>CGAGGAGGAATATCGTCGGAGCTGTACACCATAGCACTACGTTGAA<br>GATCGTACAGAGCTTTATTA ACTTCTCGCTTCTCCATATTAAGTTGTC<br>TAGTTAGTTGTGCAGCAGTAGCTCCTTCGATTCCAATGGTTTTAATAG<br>CCTCACACACAATCTCTGCGTTAGAACGCTCGTCGATATAGATTTTA<br>GACAT |
|--------------------------------------------------------------------------------------------------------------------------------------------------------------------------------------------------------------------------------------------------------------------------------------------------------------------------------------------------------------------------------|

**Table S5.** Detection of MPXV based on isothermal amplification technique.

| Technique         | Target gene | Limit of detection                                           | One-step | Reference  |
|-------------------|-------------|--------------------------------------------------------------|----------|------------|
| RPA               | G2R         | 16 DNA molecules/ $\mu$ L                                    | √        | 29         |
| LAMP              | ATI<br>D14L | $10^2$ copies/ $\mu$ L<br>$10^{2.4}$ copies/ $\mu$ L         | √        | 30         |
| LAMP              | A27L<br>F3L | 20 copies/reaction<br>20 copies/reaction                     | √        | 31         |
| LAMP              | ATI         | 1 copy/ $\mu$ L                                              | √        | 32         |
| RPA-CRISPR/Cas12a | G2R         | 1 copy/reaction                                              | ×        | 33         |
| RPA-CRISPR/Cas12a | B7R         | 13.5 copies/ $\mu$ L                                         | ×        | 19         |
| RPA-CRISPR/Cas12a | B6R<br>F3L  | 10.6 viral particles/ $\mu$ L<br>11 viral particles/ $\mu$ L | ×        | 27         |
| RPA-CRISPR/Cas12a | E9L         | 1 copy/ $\mu$ L                                              | ×        | 34         |
| RPA-CRISPR/Cas12a | F3L<br>B6R  | 1 copy/ $\mu$ L<br>1 copy/ $\mu$ L                           | ×        | 25         |
| RPA-CRISPR/Cas12a | N4R         | 1 copy/ $\mu$ L                                              | ×        | 35         |
| RPA-CRISPR/Cas12a | F3L         | 10 copies/ $\mu$ l                                           | ×        | 36         |
| HCR-CRISPR/Cas12a | F3L         | 1 copy                                                       | ×        | 37         |
| RPA-CRISPR/Cas12a | NA          | 1 copy/ $\mu$ L                                              | ×        | 38         |
| RPA-CRISPR/Cas12a | F3L         | 5 viral particles/ $\mu$ L                                   | √        | This study |
